# Supplementary material for: Randomized Controlled Trials Versus Real World Evidence: Neither Magic Nor Myth
Source: PubMed Central journal article supplement — Clin Pharmacol Ther. 2020 Nov 12;109(5):1212–8. doi: 10.1002/cpt.2083 (PMC8246742; doi:10.1002/cpt.2083), 2020-11-12

| Product Name<br>(click for EPAR) | Orphan or Rare              | Prevalence in EU<br>(per 10,000) | Product INN                                         | Therapeutic Indication - Summary                                                                                           | Type             | Prescribing limitations<br>(Posology and method of administration: Annex I, 4.2)                                                                                                                                                                                                                                                                                                                                                                                            |
|----------------------------------|-----------------------------|----------------------------------|-----------------------------------------------------|----------------------------------------------------------------------------------------------------------------------------|------------------|-----------------------------------------------------------------------------------------------------------------------------------------------------------------------------------------------------------------------------------------------------------------------------------------------------------------------------------------------------------------------------------------------------------------------------------------------------------------------------|
| <a href="#">ADYNOVI</a>          | Rare, no orphan designation | 1.3                              | rurioctocog alfa pegol                              | treatment of haemophilia A                                                                                                 | Biological       | Treatment should be under the supervision of a physician experienced in the treatment of                                                                                                                                                                                                                                                                                                                                                                                    |
| <a href="#">Aimovig</a>          | Not rare                    |                                  | erenumab                                            | prophylaxis of migraine                                                                                                    | Biological       | Treatment should be initiated by physicians experienced in the diagnosis and treatment of                                                                                                                                                                                                                                                                                                                                                                                   |
| <a href="#">AJOVY</a>            | Not rare                    |                                  | fremanezumab                                        | prevention of episodic and chronic migraine                                                                                | Biological       | The treatment should be initiated by a physician experienced in the diagnosis and treatment of                                                                                                                                                                                                                                                                                                                                                                              |
| <a href="#">Alofisel</a>         | Orphan                      | 2.3                              | darvadstrocel                                       | treatment of complex perianal fistula(s)                                                                                   | ATMP, Biological | Alofisel should only be administered by specialist physicians experienced in the diagnosis and treatment of conditions for which Alofisel is indicated                                                                                                                                                                                                                                                                                                                      |
| <a href="#">Alpivab</a>          | Not rare                    |                                  | peramivir                                           | treatment of influenza                                                                                                     | Chemical         | n/a                                                                                                                                                                                                                                                                                                                                                                                                                                                                         |
| <a href="#">Alunbrig</a>         | Not rare                    |                                  | brigatinib / brigatinib                             | treatment of anaplastic lymphoma kinase (ALK)-positive non-small cell lung cancer (NSCLC)                                  | Chemical         | Treatment with Alunbrig should be initiated and supervised by a physician experienced in the use of anticancer medicinal products. ALK-positive NSCLC status should be known prior to initiation of Alunbrig therapy. A validated ALK assay is necessary for the selection of ALK-positive NSCLC patients (see section 5.1). Assessment for ALK-positive NSCLC should be performed by laboratories with demonstrated proficiency in the specific technology being utilised. |
| <a href="#">Besremi</a>          | Orphan not confirmed        | 3                                | ropeginterferon alfa-2b                             | treatment of polycythemia vera                                                                                             | Biological       | Treatment should be initiated under supervision of a physician experienced in the management of the                                                                                                                                                                                                                                                                                                                                                                         |
| <a href="#">Biktarvy</a>         | Not rare                    |                                  | bictegravir / emtricitabine / tenofovir alafenamide | treatment of adults infected with human immunodeficiency virus-1 (HIV-1)                                                   | Chemical         | Therapy should be initiated by a physician experienced in the management of HIV infection.                                                                                                                                                                                                                                                                                                                                                                                  |
| <a href="#">Braftovi</a>         | Not rare                    |                                  | encorafenib                                         | treatment of adult patients with unresectable or metastatic melanoma with a BRAF V600 mutation                             | Chemical         | Encorafenib treatment in combination with binimetinib should be initiated and supervised under the responsibility of a physician experienced in the use of anticancer medicinal products                                                                                                                                                                                                                                                                                    |
| <a href="#">Cablivi</a>          | Orphan                      | 2.2-2.9                          | caplacizumab                                        | indicated for the treatment of acquired thrombotic thrombocytopenic purpura (aTTP).                                        | Biological       | Treatment with Cablivi should be initiated and supervised by physicians experienced in the management of patients with thrombotic microangiopathies.                                                                                                                                                                                                                                                                                                                        |
| <a href="#">CRYSVITA</a>         | Orphan                      | 0.002-0.04                       | burosumab                                           | treatment of X-linked hypophosphataemia (XLH)                                                                              | Biological       | Treatment should be initiated by a physician experienced in the management of patients with metabolic bone diseases.                                                                                                                                                                                                                                                                                                                                                        |
| <a href="#">Delstrigo</a>        | Not rare                    |                                  | doravirine / lamivudine / tenofovir disoproxil      | treatment of adults infected with HIV-1 without past or present evidence of viral resistance to doravirine, lamivudine, or | Chemical         | Therapy should be initiated by a physician experienced in the management of HIV infection                                                                                                                                                                                                                                                                                                                                                                                   |
| <a href="#">Dengvaxia</a>        | Not rare                    |                                  | dengue tetravalent vaccine (live, attenuated)       | prevention of dengue disease caused by dengue virus serotypes 1, 2, 3 and 4                                                | Biological       | n/a                                                                                                                                                                                                                                                                                                                                                                                                                                                                         |

| Product Name<br>(click for EPAR) | Orphan or Rare              | Prevalence in EU<br>(per 10,000) | Product INN                                                              | Therapeutic Indication -<br>Summary                                                                                                                                                 | Type       | Prescribing limitations<br>(Posology and method of administration: Annex I,<br>4.2)                                                                                                                                                                                                                                                                                                                                                                                                                                                                               |
|----------------------------------|-----------------------------|----------------------------------|--------------------------------------------------------------------------|-------------------------------------------------------------------------------------------------------------------------------------------------------------------------------------|------------|-------------------------------------------------------------------------------------------------------------------------------------------------------------------------------------------------------------------------------------------------------------------------------------------------------------------------------------------------------------------------------------------------------------------------------------------------------------------------------------------------------------------------------------------------------------------|
| <a href="#">Doptelet</a>         | Not rare                    |                                  | avatrombopag                                                             | treatment of thrombocytopenia                                                                                                                                                       | Chemical   | Obtain a platelet count prior to the administration of Doptelet therapy and on the day of a procedure to ensure an adequate increase in platelet count, and no unexpectedly high increase in platelet count in the patient populations specified in sections 4.4 and 4.5.                                                                                                                                                                                                                                                                                         |
| <a href="#">Emgality</a>         | Not rare                    |                                  | galcanezumab                                                             | prophylaxis of migraine                                                                                                                                                             | Biological | Treatment should be initiated by physicians experienced in the diagnosis and treatment of                                                                                                                                                                                                                                                                                                                                                                                                                                                                         |
| <a href="#">Erleada</a>          | Not rare                    |                                  | apalutamide                                                              | treatment of non metastatic castration resistant prostate cancer (NM CRPC)                                                                                                          | Chemical   | Treatment with apalutamide should be initiated and supervised by specialist physicians experienced in the medical treatment of prostate cancer.                                                                                                                                                                                                                                                                                                                                                                                                                   |
| <a href="#">Ervebo</a>           | Not rare                    |                                  | recombinant vesicular stomatitis virus - Zaire ebolavirus vaccine (live) | Ebola Vaccine                                                                                                                                                                       | Biological | Ervebo should be administered by a trained healthcare worker.                                                                                                                                                                                                                                                                                                                                                                                                                                                                                                     |
| <a href="#">Esperoct</a>         | Rare, no orphan designation | 1.3                              | turoctocog alfa pegol                                                    | treatment and prophylaxis of bleeding in patients with haemophilia A                                                                                                                | Biological | Treatment should be initiated under the supervision of a physician experienced in the treatment of haemophilia.                                                                                                                                                                                                                                                                                                                                                                                                                                                   |
| <a href="#">Evenity</a>          | Not rare                    |                                  | romosozumab                                                              | Treatment of osteoporosis                                                                                                                                                           | Biological | Treatment should be initiated and supervised by specialist physicians experienced in the management of osteoporosis.                                                                                                                                                                                                                                                                                                                                                                                                                                              |
| <a href="#">Fasenra</a>          | Not rare                    |                                  | benralizumab                                                             | treatment of severe asthma with an eosinophilic phenotype                                                                                                                           | Biological | Fasenra treatment should be initiated by a physician experienced in the diagnosis and treatment of severe asthma. After proper training in the subcutaneous injection technique and education about signs and symptoms of hypersensitivity reactions (see section 4.4), patients with no known history of anaphylaxis or their caregivers may administer Fasenra if their physician determines that it is appropriate, with medical follow-up as necessary. Self-administration should only be considered in patients already experienced with Fasenra treatment. |
| <a href="#">Giapreza</a>         | Not rare                    |                                  | angiotensin II                                                           | treatment of hypotension in adults with distributive or vasodilatory shock who remain hypotensive despite fluid and vasopressor therapy                                             | Chemical   | GIAPREZA should be prescribed by a physician experienced in the treatment of shock and is intended for use in an acute and hospital setting.                                                                                                                                                                                                                                                                                                                                                                                                                      |
| <a href="#">Hemlibra</a>         | Rare, no orphan designation | 1.3                              | emicizumab                                                               | routine prophylaxis to prevent bleeding or reduce the frequency of bleeding episodes in patients with haemophilia A (congenital factor VIII deficiency) with factor VIII inhibitors | Chemical   | Treatment should be initiated under the supervision of a physician experienced in the treatment of haemophilia and/or bleeding disorders.                                                                                                                                                                                                                                                                                                                                                                                                                         |
| <a href="#">Ilumetri</a>         | Not rare                    |                                  | tildrakizumab                                                            | treatment of moderate-to-severe plaque psoriasis                                                                                                                                    | Biological | Ilumetri is intended for use under the guidance and supervision of a physician experienced in the diagnosis and treatment of plaque psoriasis                                                                                                                                                                                                                                                                                                                                                                                                                     |

| Product Name<br>(click for EPAR)             | Orphan or Rare              | Prevalence in EU<br>(per 10,000) | Product INN                    | Therapeutic Indication - Summary                                                                                               | Type             | Prescribing limitations<br>(Posology and method of administration: Annex I, 4.2)                                                                                                                                                                                                                                                                                                                                                                                                                                                         |
|----------------------------------------------|-----------------------------|----------------------------------|--------------------------------|--------------------------------------------------------------------------------------------------------------------------------|------------------|------------------------------------------------------------------------------------------------------------------------------------------------------------------------------------------------------------------------------------------------------------------------------------------------------------------------------------------------------------------------------------------------------------------------------------------------------------------------------------------------------------------------------------------|
| <a href="#">Imfinzi</a>                      | Not rare                    |                                  | durvalumab                     | treatment of locally advanced, unresectable non-small cell lung cancer (NSCLC)                                                 | Biological       | Treatment must be initiated and supervised by a physician experienced in the treatment of cancer.                                                                                                                                                                                                                                                                                                                                                                                                                                        |
| <a href="#">Jivi</a>                         | Orphan not confirmed        | 0.73                             | damoctocog alfa pegol          | Treatment and prophylaxis of haemophilia A                                                                                     | Biological       | Treatment should be under the supervision of a physician experienced in the treatment of                                                                                                                                                                                                                                                                                                                                                                                                                                                 |
| <a href="#">Kymriah</a>                      | Orphan                      | 1.2                              | tisagenlecleucel               | treatment of B cell acute lymphoblastic leukaemia (ALL) and diffuse large B cell lymphoma (DLBCL)                              | ATMP, Biological | Kymriah must be administered in a qualified treatment centre. Therapy should be initiated under the direction of and supervised by a healthcare professional experienced in the treatment of haematological malignancies and trained for administration and management of patients treated with Kymriah. Tocilizumab for use in the event of cytokine release syndrome and emergency equipment must be available per patient prior to infusion. The treatment centre must have access to additional doses of tocilizumab within 8 hours. |
| <a href="#">Lamzede</a>                      | Orphan                      | 0.1                              | velmanase alfa                 | indicated for long-term enzyme replacement therapy in patients with alpha-mannosidosis                                         | Biological       | The treatment should be supervised by a physician experienced in the management of patients with alpha-mannosidosis or in the administration of other enzyme replacement therapies (ERT) for lysosomal storage disorder. Administration of Lamzede should be carried out by a healthcare professional with the ability to manage ERT and medical emergencies.                                                                                                                                                                            |
| <a href="#">LIBTAYO</a>                      | Not rare                    |                                  | cemiplimab                     | as monotherapy, indicated for the treatment of patients with metastatic cutaneous squamous cell carcinoma                      | Biological       | Treatment must be initiated and supervised by physicians experienced in the treatment of cancer                                                                                                                                                                                                                                                                                                                                                                                                                                          |
| <a href="#">Lokelma</a>                      | Not rare                    |                                  | sodium zirconium cyclosilicate | for the treatment of hyperkalaemia                                                                                             | Chemical         | n/a                                                                                                                                                                                                                                                                                                                                                                                                                                                                                                                                      |
| <a href="#">Lorviqua</a>                     | Not rare                    |                                  | lorlatinib                     | treatment of adult patients with anaplastic lymphoma kinase (ALK)-positive advanced non-small cell lung cancer (NSCLC)         | Chemical         | Treatment with lorlatinib should be initiated and supervised by a physician experienced in the use of anticancer medicinal products.                                                                                                                                                                                                                                                                                                                                                                                                     |
| <a href="#">Luxturna</a>                     | Orphan                      | 3                                | voretigene neparvovec          | treatment of patients with vision loss due to Leber congenital amaurosis or retinitis pigmentosa inherited retinal dystrophy   | ATMP, Biological | Treatment should be initiated and administered by a retinal surgeon experienced in performing macular surgery.                                                                                                                                                                                                                                                                                                                                                                                                                           |
| <a href="#">Macimorelin Aeterna Zentaris</a> | Rare, no orphan designation | 4.7                              | macimorelin                    | diagnosis of Adult growth hormone deficiency (AGHD)                                                                            | Chemical         | The use of Macimorelin Aeterna Zentaris must be supervised by a physician or healthcare professional experienced in diagnosing growth hormone deficiency.                                                                                                                                                                                                                                                                                                                                                                                |
| <a href="#">Mektovi</a>                      | Not rare                    |                                  | binimetinib                    | treatment of adult patients with unresectable or metastatic melanoma with a BRAF V600 mutation in combination with encorafenib | Chemical         | Binimetinib treatment in combination with encorafenib should be initiated and supervised under the responsibility of a physician experienced in the use of anticancer medicinal products.                                                                                                                                                                                                                                                                                                                                                |

| Product Name<br>(click for EPAR) | Orphan or Rare | Prevalence in<br>EU<br>(per 10,000) | Product INN           | Therapeutic Indication -<br>Summary                                                                                                                                  | Type       | Prescribing limitations<br>(Posology and method of administration: Annex I,<br>4.2)                                                                                                                                                                                                                         |
|----------------------------------|----------------|-------------------------------------|-----------------------|----------------------------------------------------------------------------------------------------------------------------------------------------------------------|------------|-------------------------------------------------------------------------------------------------------------------------------------------------------------------------------------------------------------------------------------------------------------------------------------------------------------|
| <a href="#">Mepsevii</a>         | Orphan         | 0.001                               | vestronidase alfa     | Mepsevii is indicated for the treatment of Mucopolysaccharidosis VII (MPS VII; Sly syndrome) for patients of all ages                                                | Biological | Treatment should be supervised by a healthcare professional experienced in the management of patients with MPS VII or other inherited metabolic disorders. Administration of vestronidase alfa should be carried out by an appropriately trained healthcare professional with the ability to manage medical |
| <a href="#">Mulpleo</a>          | Not rare       |                                     | lusutrombopag         | treatment of thrombocytopenia                                                                                                                                        | Chemical   | n/a                                                                                                                                                                                                                                                                                                         |
| <a href="#">Myalepta</a>         | Orphan         | 0.002                               | metreleptin           | treatment of leptin deficiency (lipodystrophy)                                                                                                                       | Biological | Treatment should be initiated and monitored by a healthcare professional experienced in the diagnosis and management of metabolic disorders.                                                                                                                                                                |
| <a href="#">Mylotarg</a>         | Orphan         | 1                                   | gemtuzumab ozogamicin | combination therapy with daunorubicin (DNR) and cytarabine (AraC) for the treatment of patients with previously untreated, de novo acute myeloid leukaemia (AML)     | Biological | MYLOTARG should be administered under the supervision of a physician experienced in the use of anticancer medicinal products and in an environment where full resuscitation facilities are immediately available.                                                                                           |
| <a href="#">Nerlynx</a>          | Not rare       |                                     | neratinib             | extended adjuvant treatment of adult patients with early-stage HER2-overexpressed/amplified breast cancer who have received prior adjuvant trastuzumab based therapy | Chemical   | Nerlynx treatment should be initiated and supervised by a physician experienced in the administration of anti-cancer medicinal products.                                                                                                                                                                    |
| <a href="#">Ocrevus</a>          | Not rare       |                                     | ocrelizumab           | treatment of multiple sclerosis<br>treatment of multiple sclerosis                                                                                                   | Biological | Ocrevus treatment should be initiated and supervised by specialised physicians experienced in the diagnosis and treatment of neurological conditions and who have access to appropriate medical support to manage severe reactions such as serious infusion-related reactions (IRRs).                       |
| <a href="#">Ondexxya</a>         | Not rare       |                                     | andexanet alfa        | treatment of direct or indirect factor Xa(FXa) inhibitor when reversal of anticoagulation is needed                                                                  | Biological | Restricted to hospital use only.                                                                                                                                                                                                                                                                            |
| <a href="#">Onpattro</a>         | Orphan         | 0.14                                | patisiran             | treatment of hereditary transthyretin-mediated amyloidosis                                                                                                           | Chemical   | Therapy should be initiated under the supervision of a physician knowledgeable in the management of amyloidosis.                                                                                                                                                                                            |
| <a href="#">Ozempic</a>          | Not rare       |                                     | semaglutide           | treatment to improve glycaemic control in adults with type 2 diabetes and to prevent cardiovascular events                                                           | Biological | n/a                                                                                                                                                                                                                                                                                                         |
| <a href="#">Palynziq</a>         | Orphan         | 2                                   | pegvaliase            | treatment of adults with phenylketonuria (PKU) who have inadequate blood phenylalanine control                                                                       | Biological | Treatment with Palynziq should be directed by physicians experienced in the management of PKU.                                                                                                                                                                                                              |

| Product Name<br>(click for EPAR) | Orphan or Rare       | Prevalence in EU<br>(per 10,000) | Product INN                                     | Therapeutic Indication -<br>Summary                                                                                                                                                                        | Type       | Prescribing limitations<br>(Posology and method of administration: Annex I,<br>4.2)                                                                                                                                        |
|----------------------------------|----------------------|----------------------------------|-------------------------------------------------|------------------------------------------------------------------------------------------------------------------------------------------------------------------------------------------------------------|------------|----------------------------------------------------------------------------------------------------------------------------------------------------------------------------------------------------------------------------|
| <a href="#">Pifeltro</a>         | Not rare             |                                  | doravirine                                      | treatment of adults infected with HIV-1 without past or present evidence of viral resistance to treatment of adults infected with HIV-1 without past or present evidence of viral resistance to doravirine | Chemical   | Therapy should be initiated by a physician experienced in the management of HIV infection.                                                                                                                                 |
| <a href="#">POTELIGEO</a>        | Orphan               | 2.6                              | mogamulizumab                                   | treatment mycosis fungoides (MF) or Sézary syndrome (SS)                                                                                                                                                   | Biological | Treatment must be initiated and supervised by physicians experienced in the treatment of cancer, and should only be administered by healthcare professionals in an environment where resuscitation equipment is available. |
| <a href="#">PREVYMIS</a>         | Orphan               | 3.8                              | letermovir                                      | prophylaxis of cytomegalovirus (CMV) reactivation and disease                                                                                                                                              | Chemical   | PREVYMIS should be initiated by a physician experienced in the management of patients who have had an allogeneic haematopoietic stem cell transplant.                                                                      |
| <a href="#">Quofenix</a>         | Not rare             |                                  | delafloxacin                                    | treatment of Acute Bacterial Skin and Skin Structure Infections (ABSSSI) in adults                                                                                                                         | Chemical   | n/a                                                                                                                                                                                                                        |
| <a href="#">Rhokiinsa</a>        | Not rare             |                                  | netarsudil                                      | indicated for the reduction of elevated intraocular pressure (IOP) in adults with open-angle glaucoma or ocular hypertension.                                                                              | Chemical   | Treatment with Rhokiinsa should only be initiated by an ophthalmologist or a healthcare professional qualified in ophthalmology.                                                                                           |
| <a href="#">Rinvoq</a>           | Not rare             |                                  | upadacitinib                                    | treatment of moderate to severe active rheumatoid arthritis                                                                                                                                                | Chemical   | Treatment with upadacitinib should be initiated and supervised by physicians experienced in the diagnosis and treatment of rheumatoid arthritis.                                                                           |
| <a href="#">Rizmoic</a>          | Not rare             |                                  | naldemedine                                     | treatment of opioid-induced constipation (OIC) in adult patients.                                                                                                                                          | Chemical   | n/a                                                                                                                                                                                                                        |
| <a href="#">Rubraca</a>          | Orphan not confirmed | 4.6-5.4                          | rucaparib                                       | treatment of ovarian cancer                                                                                                                                                                                | Chemical   | Treatment with rucaparib should be initiated and supervised by a physician experienced in the use of anticancer medicinal products.                                                                                        |
| <a href="#">RXULTI</a>           | Not rare             |                                  | brexpiprazole                                   | treatment of schizophrenia                                                                                                                                                                                 | Chemical   | n/a                                                                                                                                                                                                                        |
| <a href="#">Segluromet</a>       | Not rare             |                                  | ertugliflozin / metformin hydrochloride         | treatment of type 2 diabetes mellitus                                                                                                                                                                      | Chemical   | n/a                                                                                                                                                                                                                        |
| <a href="#">Shingrix</a>         | Not rare             |                                  | herpes zoster vaccine (recombinant, adjuvanted) | prevention of herpes zoster (HZ) and HZ-related complications                                                                                                                                              | Biological | n/a                                                                                                                                                                                                                        |
| <a href="#">Skyrizi</a>          | Not rare             |                                  | risankizumab                                    | treatment of psoriasis                                                                                                                                                                                     | Biological | Skyrizi is intended for use under the guidance and supervision of a physician experienced in the diagnosis and treatment of psoriasis.                                                                                     |
| <a href="#">Steglatro</a>        | Not rare             |                                  | ertugliflozin                                   | treatment of type 2 diabetes mellitus                                                                                                                                                                      | Chemical   | n/a                                                                                                                                                                                                                        |
| <a href="#">Steglujan</a>        | Not rare             |                                  | ertugliflozin / sitagliptin                     | type 2 diabetes mellitus                                                                                                                                                                                   | Chemical   | n/a                                                                                                                                                                                                                        |

| Product Name<br>(click for EPAR) | Orphan or Rare       | Prevalence in<br>EU<br>(per 10,000) | Product INN                | Therapeutic Indication -<br>Summary                                                                                                                                                                                                         | Type       | Prescribing limitations<br>(Posology and method of administration: Annex I,<br>4.2)                                                                                                                                                                                                                                                                                                                                                                                                                    |
|----------------------------------|----------------------|-------------------------------------|----------------------------|---------------------------------------------------------------------------------------------------------------------------------------------------------------------------------------------------------------------------------------------|------------|--------------------------------------------------------------------------------------------------------------------------------------------------------------------------------------------------------------------------------------------------------------------------------------------------------------------------------------------------------------------------------------------------------------------------------------------------------------------------------------------------------|
| <a href="#">Symkevi</a>          | Orphan               | 0.93                                | tezacaftor /<br>ivacaftor  | treatment of cystic fibrosis                                                                                                                                                                                                                | Chemical   | Symkevi should only be prescribed by physicians with experience in the treatment of CF. If the patient's genotype is unknown, an accurate and validated genotyping method should be performed to confirm the presence of an indicated mutation using a genotyping assay                                                                                                                                                                                                                                |
| <a href="#">TAKHZYRO</a>         | Orphan               | 0.5                                 | lanadelumab                | treatment of angioedema attacks                                                                                                                                                                                                             | Biological | This medicinal product should be initiated under the supervision of a physician experienced in the management of patients with hereditary angioedema (HAE).                                                                                                                                                                                                                                                                                                                                            |
| <a href="#">Talzenna</a>         | Not rare             |                                     | talazoparib                | treatment of germline breast cancer susceptibility gene (BRCA) mutated human epidermal growth factor receptor 2 (HER2) negative locally advanced or metastatic breast cancer                                                                | Chemical   | Treatment with Talzenna should be initiated and supervised by a physician experienced in the use of anticancer medicinal products. 3 Patients should be selected for the treatment of breast cancer with Talzenna based on the presence of deleterious or suspected deleterious germline BRCA mutations determined by an experienced laboratory using a validated test method. Genetic counselling for patients with BRCA mutations should be performed according to local regulations, as applicable. |
| <a href="#">Tegsedi</a>          | Orphan               | 3                                   | inotersen                  | treatment of transthyretin amyloidosis (hATTR)                                                                                                                                                                                              | Chemical   | Treatment should be initiated by and remain under the supervision of a physician experienced in the treatment of patients with hereditary transthyretin                                                                                                                                                                                                                                                                                                                                                |
| <a href="#">Trogarzo</a>         | Not rare             |                                     | ibalizumab                 | treatment of adults infected with HIV-1 resistant to at least 1 agent in 3 different classes                                                                                                                                                | Chemical   | Therapy should be initiated by a physician experienced in the management of HIV infection.                                                                                                                                                                                                                                                                                                                                                                                                             |
| <a href="#">Ultomiris</a>        | Orphan not confirmed | 0.2                                 | ravulizumab                | treatment of paroxysmal nocturnal hemoglobinuria (PNH)                                                                                                                                                                                      | Biological | Ravulizumab must be administered by a healthcare professional and under the supervision of a physician experienced in the management of patients with haematological disorders.                                                                                                                                                                                                                                                                                                                        |
| <a href="#">Vaborem</a>          | Not rare             |                                     | meropenem /<br>vaborbactam | treatment of urinary tract infection (cUTI), including pyelonephritis, intra-abdominal infection (cIAI), hospital-acquired pneumonia (HAP), including ventilator associated pneumonia (VAP) including ventilator associated pneumonia (VAP) | Chemical   | Vaborem should be used to treat infections due to aerobic Gram-negative organisms in adult patients with limited treatment options only after consultation with a physician with appropriate experience in the management of infectious diseases                                                                                                                                                                                                                                                       |
| <a href="#">Verzenios</a>        | Not rare             |                                     | abemaciclib                | treatment of hormone receptor (HR) positive, human epidermal growth factor receptor 2 (HER2) negative locally advanced or metastatic breast cancer                                                                                          | Chemical   | Verzenios therapy should be initiated and supervised by physicians experienced in the use of anti-cancer therapies.                                                                                                                                                                                                                                                                                                                                                                                    |

| Product Name<br>(click for EPAR) | Orphan or Rare | Prevalence in<br>EU<br>(per 10,000) | Product INN              | Therapeutic Indication -<br>Summary                                                                                                                           | Type             | Prescribing limitations<br>(Posology and method of administration: Annex I,<br>4.2)                                                                                                                                                                                                                                                                                                                                                                                                           |
|----------------------------------|----------------|-------------------------------------|--------------------------|---------------------------------------------------------------------------------------------------------------------------------------------------------------|------------------|-----------------------------------------------------------------------------------------------------------------------------------------------------------------------------------------------------------------------------------------------------------------------------------------------------------------------------------------------------------------------------------------------------------------------------------------------------------------------------------------------|
| <a href="#">VITRAKVI</a>         | Not rare       |                                     | larotrectinib            | treatment of adult and paediatric patients with locally advanced or metastatic solid tumours                                                                  | Chemical         | Treatment with VITRAKVI should be initiated by physicians experienced in the administration of anticancer therapies. The presence of an NTRK gene fusion in a tumour specimen should be confirmed by a validated test prior to initiation of treatment with VITRAKVI.                                                                                                                                                                                                                         |
| <a href="#">Vizimpro</a>         | Not rare       |                                     | dacomitinib              | first-line treatment of adults with locally advanced or metastatic non-small cell lung cancer (NSCLC) with epidermal growth factor receptor (EGFR)-activating | Chemical         | Treatment with Vizimpro should be initiated and supervised by a physician experienced in the use of anticancer medicinal products. EGFR mutation status should be established prior to initiation of dacomitinib therapy (see section 4.4).                                                                                                                                                                                                                                                   |
| <a href="#">WAYLIVRA</a>         | Orphan         | 0.1                                 | volanesorsen             | treatment of patients with familial chylomicronemia                                                                                                           | Chemical         | n/a                                                                                                                                                                                                                                                                                                                                                                                                                                                                                           |
| <a href="#">Xerava</a>           | Not rare       |                                     | eravacycline             | treatment of complicated intra-abdominal infections (cIAI) in adults                                                                                          | Chemical         | n/a                                                                                                                                                                                                                                                                                                                                                                                                                                                                                           |
| <a href="#">XOSPATA</a>          | Orphan         | 1.4                                 | gilteritinib             | treatment of patients who have relapsed or refractory acute myeloid leukemia (AML) with a FLT3 mutation                                                       | Chemical         | Treatment with Xospata should be initiated and supervised by a physician experienced in the use of anti-cancer therapies. Before taking gilteritinib, relapsed or refractory AML patients must have confirmation of FMS-like tyrosine kinase 3 (FLT3) mutation (internal tandem duplication [ITD] or tyrosine kinase domain [TKD]) using a validated test. Xospata may be re-initiated in patients following haematopoietic stem cell transplantation (HSCT) (see                             |
| <a href="#">YESCARTA</a>         | Orphan         | 0.5                                 | axicabtagene ciloleucel  | treatment of diffuse large B-cell lymphoma (DLBCL), primary mediastinal B-cell lymphoma (PMBCL) and transformed follicular lymphoma (TFL)                     | ATMP, Biological | YESCARTA must be administered in a qualified clinical setting. YESCARTA therapy should be initiated under the direction of and supervised by a healthcare professional experienced in the treatment of haematological malignancies and trained for administration and management of patients treated with YESCARTA. A minimum of four doses of 3 tocilizumab for use in the event of cytokine release syndrome (CRS) and emergency equipment must be available prior to infusion of YESCARTA. |
| <a href="#">Zynquista</a>        | Not rare       |                                     | sotagliflozin            | indicated as an adjunct to insulin therapy to improve glycaemic control in adults with type 1 diabetes mellitus                                               | Chemical         | Therapy with Zynquista should be initiated and supervised by a physician experienced in the management of type 1 diabetes mellitus.                                                                                                                                                                                                                                                                                                                                                           |
| <a href="#">Zynteglo</a>         | Orphan         | 0.7                                 | Betibeglogene autotemcel | treatment of transfusion-dependent $\beta$ -thalassaemia (TDT)                                                                                                | ATMP, Biological | Zynteglo must be administered in a qualified treatment centre by a physician(s) with experience in HSC transplantation and in the treatment of patients with TDT. Patients are expected to enrol in a registry and will be followed in the registry in order to better understand the long-term safety and efficacy of                                                                                                                                                                        |



| Product Name<br>(click for EPAR) | ATC Code | ATC short | ATC code description                       | New Active Substance status | Conditional, Exceptional or Standard marketing authorisation | EC decision | Marketing Authorisation Holder |
|----------------------------------|----------|-----------|--------------------------------------------|-----------------------------|--------------------------------------------------------------|-------------|--------------------------------|
| <a href="#">ADYNOVI</a>          | B02BD02  | B         | Blood and blood forming organs             | Y                           | STANDARD                                                     | 2018        | Baxalta Innovations GmbH       |
| <a href="#">Aimovig</a>          | N02CX07  | N         | Nervous system                             | Y                           | STANDARD                                                     | 2018        | Novartis Europharm Limited     |
| <a href="#">AJOVY</a>            | N02      | N         | Nervous system                             | Y                           | STANDARD                                                     | 2019        | TEVA GmbH                      |
| <a href="#">Alofisel</a>         | L04      | L         | Antineoplastic and Immunomodulating agents | Y                           | STANDARD                                                     | 2018        | TIGENIX, S.A.U.                |
| <a href="#">Alpivab</a>          | J05AH03  | J         | Antiinfectives for systemic use            | Y                           | STANDARD                                                     | 2018        | Biocryst UK Limited            |
| <a href="#">Alunbrig</a>         | L01XE43  | L         | Antineoplastic and Immunomodulating agents | Y                           | STANDARD                                                     | 2018        | Takeda Pharma A/S              |
| <a href="#">Besremi</a>          | L03AB15  | L         | Antineoplastic and Immunomodulating agents | Y                           | STANDARD                                                     | 2019        | AOP Orphan Pharmaceuticals AG  |
| <a href="#">Biktarvy</a>         | J05AR20  | J         | Antiinfectives for systemic use            | Y                           | STANDARD                                                     | 2018        | Gilead Sciences Ireland UC     |
| <a href="#">Braftovi</a>         | L01XE    | L         | Antineoplastic and Immunomodulating agents | Y                           | STANDARD                                                     | 2018        | Pierre Fabre Medicament        |
| <a href="#">Cabliivi</a>         | B01AX07  | B         | Blood and blood forming organs             | Y                           | STANDARD                                                     | 2018        | Ablynx NV                      |
| <a href="#">CRYSVITA</a>         | M05BX05  | M         | Musculo-skeletal system                    | Y                           | CONDITIONAL                                                  | 2018        | Kyowa Kirin Limited            |
| <a href="#">Delstrigo</a>        | J05AR    | J         | Antiinfectives for systemic use            | Y                           | STANDARD                                                     | 2018        | Merck Sharp & Dohme B.V.       |
| <a href="#">Dengvaxia</a>        | J07BX    | J         | Antiinfectives for systemic use            | Y                           | STANDARD                                                     | 2018        | Sanofi Pasteur                 |



| Product Name<br>(click for EPAR) | ATC Code | ATC short | ATC code description                       | New Active Substance status | Conditional, Exceptional or Standard marketing authorisation | EC decision | Marketing Authorisation Holder       |
|----------------------------------|----------|-----------|--------------------------------------------|-----------------------------|--------------------------------------------------------------|-------------|--------------------------------------|
| <a href="#">Doptelet</a>         | B02BX08  | B         | Blood and blood forming organs             | Y                           | STANDARD                                                     | 2019        | Dova Pharmaceuticals Ireland Limited |
| <a href="#">Emgality</a>         | N02CX08  | N         | Nervous system                             | Y                           | STANDARD                                                     | 2018        | Eli Lilly Nederland B.V.             |
| <a href="#">Erleada</a>          | L02BB05  | L         | Antineoplastic and Immunomodulating agents | Y                           | STANDARD                                                     | 2019        | Janssen-Cilag International N.V.     |
| <a href="#">Ervebo</a>           | J07BX02  | J         | Antiinfectives for systemic use            | Y                           | CONDITIONAL                                                  | 2019        | Merck Sharp & Dohme B.V.             |
| <a href="#">Esperoct</a>         | B02BD02  | B         | Blood and blood forming organs             | Y                           | STANDARD                                                     | 2019        | Novo Nordisk A/S                     |
| <a href="#">Evenity</a>          | M05BX06  | M         | Musculo-skeletal system                    | Y                           | STANDARD                                                     | 2019        | UCB Pharma S.A.                      |
| <a href="#">Fasenra</a>          | R03DX10  | R         | Respiratory system                         | Y                           | STANDARD                                                     | 2018        | AstraZeneca AB                       |
| <a href="#">Giapreza</a>         | C01CX09  | C         | Cardiovascular system                      | Y                           | STANDARD                                                     | 2019        | La Jolla Pharmaceutical II B.V.      |
| <a href="#">Hemlibra</a>         | B02BX06  | B         | Blood and blood forming organs             | Y                           | STANDARD                                                     | 2018        | Roche Registration GmbH              |
| <a href="#">Ilumetri</a>         | L04AC17  | L         | Antineoplastic and Immunomodulating agents | Y                           | STANDARD                                                     | 2018        | Almirall S.A                         |

| Product Name<br>(click for EPAR)                                | ATC Code | ATC short | ATC code description                       | New Active Substance status | Conditional, Exceptional or Standard marketing authorisation | EC decision | Marketing Authorisation Holder                      |
|-----------------------------------------------------------------|----------|-----------|--------------------------------------------|-----------------------------|--------------------------------------------------------------|-------------|-----------------------------------------------------|
| <a href="#">Imfinzi</a>                                         | L01XC28  | L         | Antineoplastic and Immunomodulating agents | Y                           | STANDARD                                                     | 2018        | AstraZeneca AB                                      |
| <a href="#">Jivi</a>                                            | B02BD02  | B         | Blood and blood forming organs             | Y                           | STANDARD                                                     | 2018        | Bayer AG                                            |
| <a href="#">Kymriah</a>                                         | L01      | L         | Antineoplastic and Immunomodulating agents | Y                           | STANDARD                                                     | 2018        | Novartis Europharm Limited                          |
| <a href="#">Lamzede</a>                                         | A16AB15  | A         | Alimentary tract and metabolism            | Y                           | EXCEPTIONAL                                                  | 2018        | Chiesi Farmaceutici S.p.A.                          |
| <a href="#">LIBTAYO</a>                                         | L01XC    | L         | Antineoplastic and Immunomodulating agents | Y                           | CONDITIONAL                                                  | 2019        | Regeneron Ireland Designated Activity Company (DAC) |
| <a href="#">Lokelma</a>                                         | V03AE10  | V         | Various                                    | Y                           | STANDARD                                                     | 2018        | AstraZeneca AB                                      |
| <a href="#">Lorviqua</a>                                        | L01XE44  | L         | Antineoplastic and Immunomodulating agents | Y                           | CONDITIONAL                                                  | 2019        | Pfizer Europe MA EEIG                               |
| <a href="#">Luxturna</a>                                        | -        | -         | -                                          | Y                           | STANDARD                                                     | 2018        | Novartis Europharm Limited                          |
| <a href="#">Macimorelin</a><br><a href="#">Aeterna Zentaris</a> | V04CD06  | V         | Various                                    | Y                           | STANDARD                                                     | 2019        | Aeterna Zentaris GmbH                               |
| <a href="#">Mektovi</a>                                         | L01XE41  | L         | Antineoplastic and Immunomodulating agents | Y                           | STANDARD                                                     | 2018        | Pierre Fabre Medicament                             |

| Product Name<br>(click for EPAR) | ATC Code | ATC short | ATC code description                       | New Active Substance status | Conditional, Exceptional or Standard marketing authorisation | EC decision | Marketing Authorisation Holder |
|----------------------------------|----------|-----------|--------------------------------------------|-----------------------------|--------------------------------------------------------------|-------------|--------------------------------|
| <a href="#">Mepsevii</a>         | A16AB18  | A         | Alimentary tract and metabolism            | Y                           | EXCEPTIONAL                                                  | 2018        | Ultragenyx Germany GmbH        |
| <a href="#">Mupleo</a>           | B02BX    | B         | Blood and blood forming organs             | Y                           | STANDARD                                                     | 2019        | Shionogi B.V.                  |
| <a href="#">Myalepta</a>         | A16AA07  | A         | Alimentary tract and metabolism            | Y                           | EXCEPTIONAL                                                  | 2018        | Aegerion Pharmaceuticals B.V.  |
| <a href="#">Mylotarg</a>         | L01XC05  | L         | Antineoplastic and Immunomodulating agents | Y                           | STANDARD                                                     | 2018        | Pfizer Europe MA EEIG          |
| <a href="#">Nerlynx</a>          | L01XE45  | L         | Antineoplastic and Immunomodulating agents | Y                           | STANDARD                                                     | 2018        | Puma Biotechnology Limited     |
| <a href="#">Ocrevus</a>          | L04AA36  | L         | Antineoplastic and Immunomodulating agents | Y                           | STANDARD                                                     | 2018        | Roche Registration Limited     |
| <a href="#">Ondexxya</a>         | V03AB38  | V         | Various                                    | Y                           | CONDITIONAL                                                  | 2019        | Portola Netherlands B.V.       |
| <a href="#">Onpattro</a>         | N07      | N         | Nervous system                             | Y                           | STANDARD                                                     | 2018        | Alnylam Netherlands B.V.       |
| <a href="#">Ozempic</a>          | A10BJ06  | A         | Alimentary tract and metabolism            | Y                           | STANDARD                                                     | 2018        | Novo Nordisk A/S               |
| <a href="#">Palynziq</a>         | A16AB19  | A         | Alimentary tract and metabolism            | Y                           | STANDARD                                                     | 2019        | BioMarin International Limited |

| Product Name<br>(click for EPAR) | ATC Code | ATC short | ATC code description                       | New Active Substance status | Conditional, Exceptional or Standard marketing authorisation | EC decision | Marketing Authorisation Holder                     |
|----------------------------------|----------|-----------|--------------------------------------------|-----------------------------|--------------------------------------------------------------|-------------|----------------------------------------------------|
| <a href="#">Pifeltro</a>         | J05AG06  | J         | Antiinfectives for systemic use            | Y                           | STANDARD                                                     | 2018        | Merck Sharp & Dohme B.V.                           |
| <a href="#">POTELIGEO</a>        | L01XC25  | L         | Antineoplastic and Immunomodulating agents | Y                           | STANDARD                                                     | 2018        | Kyowa Kirin Holdings B.V.                          |
| <a href="#">PREVYMIS</a>         | J05AX18  | J         | Antiinfectives for systemic use            | Y                           | STANDARD                                                     | 2018        | Merck Sharp & Dohme Limited                        |
| <a href="#">Quofenix</a>         | J01MA23  | J         | Antiinfectives for systemic use            | Y                           | STANDARD                                                     | 2019        | A. Menarini Industrie Farmaceutiche Riunite s.r.l. |
| <a href="#">Rhokiinsa</a>        | S01EX05  | S         | Sensory organs                             | Y                           | STANDARD                                                     | 2019        | Aerie Pharmaceuticals Ireland Ltd                  |
| <a href="#">Rinvog</a>           | L04AA    | L         | Antineoplastic and Immunomodulating agents | Y                           | STANDARD                                                     | 2019        | AbbVie Deutschland GmbH & Co. KG                   |
| <a href="#">Rizmoic</a>          | A06AH    | A         | Alimentary tract and metabolism            | Y                           | STANDARD                                                     | 2019        | Shionogi B.V.                                      |
| <a href="#">Rubraca</a>          | L01XX55  | L         | Antineoplastic and Immunomodulating agents | Y                           | CONDITIONAL                                                  | 2018        | Clovis Oncology Ireland Limited                    |
| <a href="#">RXULTI</a>           | N05AX16  | N         | Nervous system                             | Y                           | STANDARD                                                     | 2018        | Otsuka Pharmaceutical Netherlands B.V.             |
| <a href="#">Segluromet</a>       | A10BD23  | A         | Alimentary tract and metabolism            | Y                           | STANDARD                                                     | 2018        | Merck Sharp & Dohme B.V.                           |
| <a href="#">Shingrix</a>         | J07BK03  | J         | Antiinfectives for systemic use            | Y                           | STANDARD                                                     | 2018        | GlaxoSmithkline Biologicals SA                     |
| <a href="#">Skyrizi</a>          | L04AC18  | L         | Antineoplastic and Immunomodulating agents | Y                           | STANDARD                                                     | 2019        | AbbVie Deutschland GmbH & Co. KG                   |
| <a href="#">Steglatro</a>        | A10BK04  | A         | Alimentary tract and metabolism            | Y                           | STANDARD                                                     | 2018        | Merck Sharp & Dohme B.V.                           |
| <a href="#">Steglujan</a>        | A10BD24  | A         | Alimentary tract and metabolism            | Y                           | STANDARD                                                     | 2018        | Merck Sharp & Dohme B.V.                           |

| Product Name<br>(click for EPAR) | ATC Code | ATC short | ATC code description                       | New Active Substance status | Conditional, Exceptional or Standard marketing authorisation | EC decision | Marketing Authorisation Holder                    |
|----------------------------------|----------|-----------|--------------------------------------------|-----------------------------|--------------------------------------------------------------|-------------|---------------------------------------------------|
| <a href="#">Symkevi</a>          | R07AX31  | R         | Respiratory system                         | Y                           | STANDARD                                                     | 2018        | Vertex Pharmaceuticals (Ireland) Limited          |
| <a href="#">TAKHZYRO</a>         | B06AC05  | B         | Blood and blood forming organs             | Y                           | STANDARD                                                     | 2018        | Shire Pharmaceuticals Ireland Limited             |
| <a href="#">Talzenna</a>         | L01XX60  | L         | Antineoplastic and Immunomodulating agents | Y                           | STANDARD                                                     | 2019        | Pfizer Europe MA EEIG                             |
| <a href="#">Tegsedi</a>          | N07      | N         | Nervous system                             | Y                           | STANDARD                                                     | 2018        | Akcea Therapeutics Ireland Limited                |
| <a href="#">Trogarzo</a>         | J05AX23  | J         | Antiinfectives for systemic use            | Y                           | STANDARD                                                     | 2019        | Theratechnologies Europe Limited                  |
| <a href="#">Ultomiris</a>        | L04AA43  | L         | Antineoplastic and Immunomodulating agents | Y                           | STANDARD                                                     | 2019        | Alexion Europe SAS                                |
| <a href="#">Vaborem</a>          | J01DH52  | J         | Antiinfectives for systemic use            | Y                           | STANDARD                                                     | 2018        | Menarini International Operations Luxembourg S.A. |
| <a href="#">Verzenio</a>         | L01XE50  | L         | Antineoplastic and Immunomodulating agents | Y                           | STANDARD                                                     | 2018        | Eli Lilly Nederland B.V.                          |

| Product Name<br>(click for EPAR) | ATC Code | ATC short | ATC code description                       | New Active Substance status | Conditional, Exceptional or Standard marketing authorisation | EC decision | Marketing Authorisation Holder             |
|----------------------------------|----------|-----------|--------------------------------------------|-----------------------------|--------------------------------------------------------------|-------------|--------------------------------------------|
| <a href="#">VITRAKVI</a>         | L01XE53  | L         | Antineoplastic and Immunomodulating agents | Y                           | CONDITIONAL                                                  | 2019        | Bayer AG                                   |
| <a href="#">Vizimpro</a>         | L01XE47  | L         | Antineoplastic and Immunomodulating agents | Y                           | STANDARD                                                     | 2019        | Pfizer Europe MA EEIG                      |
| <a href="#">WAYLIVRA</a>         | C10AX    | C         | Cardiovascular system                      | Y                           | CONDITIONAL                                                  | 2019        | Akcea Therapeutics Ireland Limited         |
| <a href="#">Xerava</a>           | J01AA13  | J         | Antiinfectives for systemic use            | Y                           | STANDARD                                                     | 2018        | Tetraphase Pharmaceuticals Ireland Limited |
| <a href="#">XOSPATA</a>          | L01XE54  | L         | Antineoplastic and Immunomodulating agents | Y                           | STANDARD                                                     | 2019        | Astellas Pharma Europe B.V.                |
| <a href="#">YESCARTA</a>         | L01X     | L         | Antineoplastic and Immunomodulating agents | Y                           | STANDARD                                                     | 2018        | Kite Pharma EU B.V.                        |
| <a href="#">Zynquista</a>        | A10BK06  | A         | Alimentary tract and metabolism            | Y                           | STANDARD                                                     | 2019        | Navigant Germany GmbH                      |
| <a href="#">Zynteglo</a>         | B06      | B         | Blood and blood forming organs             | Y                           | CONDITIONAL                                                  | 2019        | bluebird bio (Netherlands) B.V             |

Products with positive decision per ATC code (1- Jan 2018 - 31 Dec 2019)

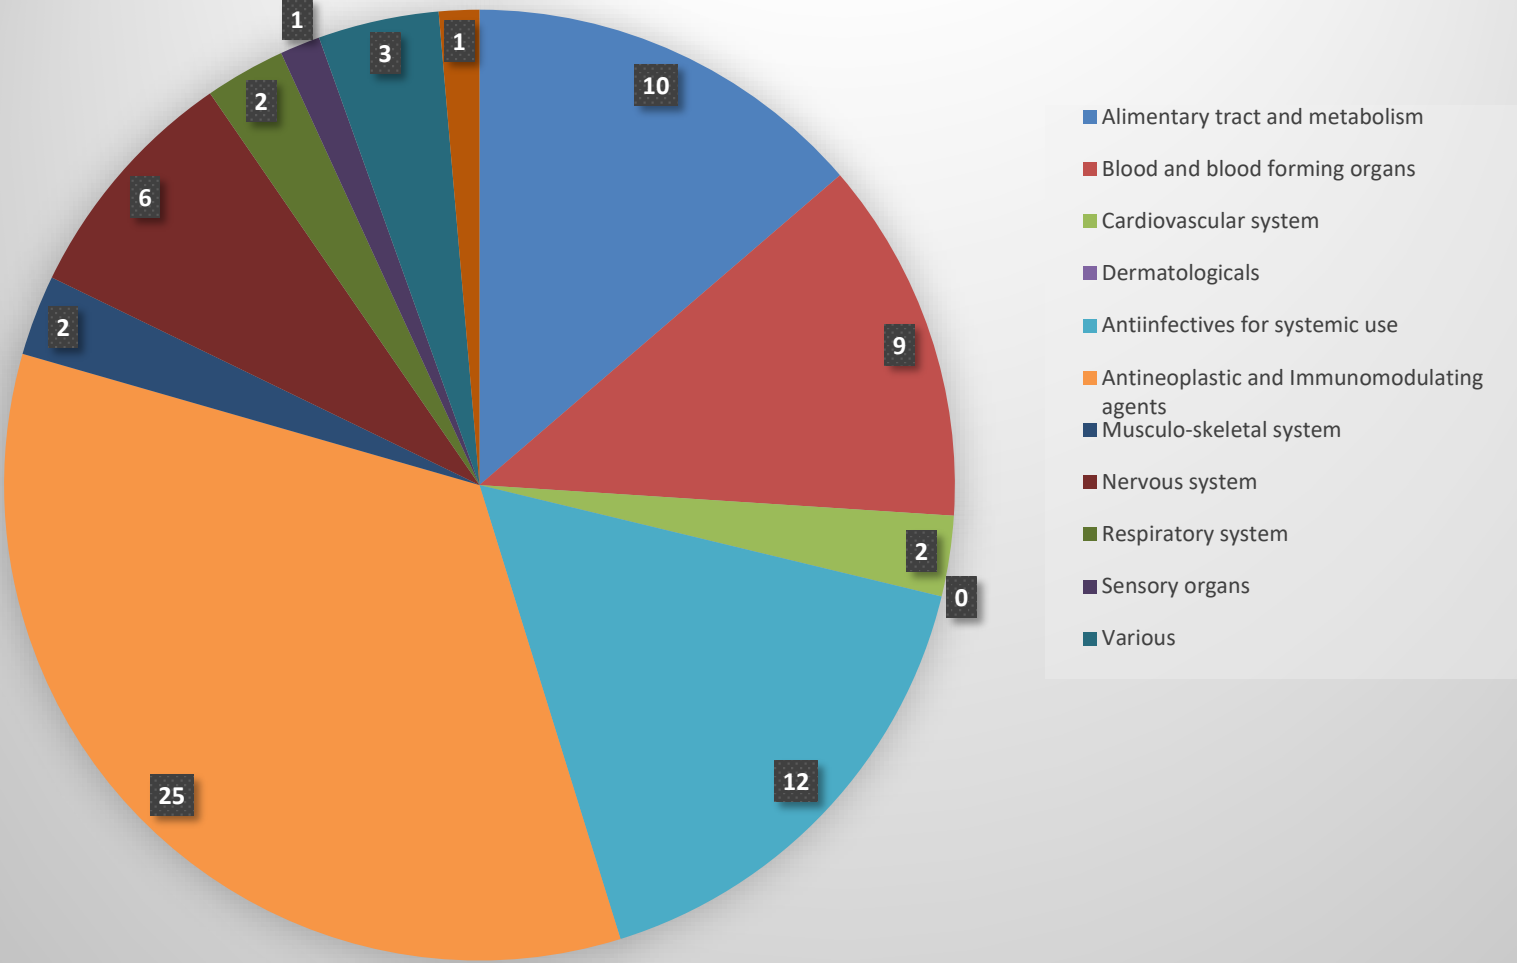

Supplement: CPT-109-1212-s001.pdf [file CPT-109-1212-s001.pdf]
